# Supplementary material for: Proteomic Stable Isotope Probing Reveals Taxonomically Distinct Patterns in Amino Acid Assimilation by Coastal Marine Bacterioplankton
Source: PubMed Central journal article supplement (PMC5069745; doi:10.1128/msystems.00027-15), 2016-04-26
Supplement: sys002162015st5.pdf [file sys002162015st5.pdf]

**Table S1: False Detection Rate of Labeled Spectra**

| Unlabeled Sample: Newport, OR |           |         |
|-------------------------------|-----------|---------|
| % <sup>13</sup> C-enrichment  | PSM count | % total |
| 0                             | 179       | 0.431%  |
| 1                             | 40,149    | 96.589% |
| 2                             | 909       | 2.187%  |
| 3                             | 244       | 0.587%  |
| 4                             | 70        | 0.168%  |
| 5                             | 15        | 0.036%  |
| 6                             | 0         | 0.000%  |
| 7                             | 1         | 0.002%  |
| 8-100                         | 0         | 0.000%  |

  

| Unlabeled Sample: Monterey Bay, CA |           |         |
|------------------------------------|-----------|---------|
| % <sup>13</sup> C-enrichment       | PSM count | % total |
| 0                                  | 67        | 0.244%  |
| 1                                  | 27,038    | 98.585% |
| 2                                  | 285       | 1.039%  |
| 3                                  | 14        | 0.051%  |
| 4                                  | 19        | 0.069%  |
| 5                                  | 3         | 0.011%  |
| 6-100                              | 0         | 0.000%  |
