# Supplementary material for: Proteomic Stable Isotope Probing Reveals Taxonomically Distinct Patterns in Amino Acid Assimilation by Coastal Marine Bacterioplankton
Source: mSystems. 2016 Apr 26;1(2):e00027-15. doi: 10.1128/mSystems.00027-15 (PMC5069745; doi:10.1128/mSystems.00027-15)
Supplement: Table S2 [file sys002162015st6.pdf]

**Table S2: Pairwise Concordance Correlation Coefficients**

| sample | OR1 | OR2   | MB1a  | MB1b  | MB1c  | MB2a  | MB2b  | MB2c  |
|--------|-----|-------|-------|-------|-------|-------|-------|-------|
| OR1    |     | 0.653 | 0.088 | 0.083 | 0.097 | 0.136 | 0.185 | 0.111 |
| OR2    |     |       | 0.123 | 0.117 | 0.136 | 0.181 | 0.252 | 0.162 |
| MB1a   |     |       |       | 0.831 | 0.819 | 0.623 | 0.702 | 0.618 |
| MB1b   |     |       |       |       | 0.807 | 0.582 | 0.697 | 0.631 |
| MB1c   |     |       |       |       |       | 0.624 | 0.746 | 0.722 |
| MB2a   |     |       |       |       |       |       | 0.739 | 0.631 |
| MB2b   |     |       |       |       |       |       |       | 0.755 |
| MB2c   |     |       |       |       |       |       |       |       |
